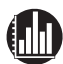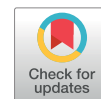

# Muscle Oxygen Supply and Use in Type 1 Diabetes, From Ambient Air to the Mitochondrial Respiratory Chain: Is There a Limiting Step?

Diabetes Care 2020;43:209–218 | <https://doi.org/10.2337/dc19-1125>

Elsa Heyman,<sup>1</sup> Frédéric Daussin,<sup>1</sup>  
Valerie Wieczorek,<sup>2</sup> Robert Caiazzo,<sup>3,4</sup>  
Régis Matran,<sup>5</sup> Phanélie Berthon,<sup>6</sup>  
Julien Aucouturier,<sup>1</sup> Serge Berthoin,<sup>1</sup>  
Aurélien Descatoire,<sup>7</sup> Erwan Leclair,<sup>1,8</sup>  
Gaëlle Marais,<sup>1</sup> Adrien Combes,<sup>1</sup>  
Pierre Fontaine,<sup>9</sup> and Sémah Tagougui<sup>1,10</sup>

## OBJECTIVE

Long before clinical complications of type 1 diabetes (T1D) develop, oxygen supply and use can be altered during activities of daily life. We examined in patients with uncomplicated T1D all steps of the oxygen pathway, from the lungs to the mitochondria, using an integrative ex vivo (muscle biopsies) and in vivo (during exercise) approach.

## RESEARCH DESIGN AND METHODS

We compared 16 adults with T1D with 16 strictly matched healthy control subjects. We assessed lung diffusion capacity for carbon monoxide and nitric oxide, exercise-induced changes in arterial O<sub>2</sub> content (SaO<sub>2</sub>, PaO<sub>2</sub>, hemoglobin), muscle blood volume, and O<sub>2</sub> extraction (via near-infrared spectroscopy). We analyzed blood samples for metabolic and hormonal vasoactive moieties and factors that are able to shift the O<sub>2</sub>-hemoglobin dissociation curve. Mitochondrial oxidative capacities were assessed in permeabilized vastus lateralis muscle fibers.

## RESULTS

Lung diffusion capacity and arterial O<sub>2</sub> transport were normal in patients with T1D. However, those patients displayed blunted exercise-induced increases in muscle blood volume, despite higher serum insulin, and in O<sub>2</sub> extraction, despite higher erythrocyte 2,3-diphosphoglycerate. Although complex I- and complex II-supported mitochondrial respirations were unaltered, complex IV capacity (relative to complex I capacity) was impaired in patients with T1D, and this was even more apparent in those with long-standing diabetes and high HbA<sub>1c</sub>.  $\dot{V}O_{2\max}$  was lower in patients with T1D than in the control subjects.

## CONCLUSIONS

Early defects in microvascular delivery of blood to skeletal muscle and in complex IV capacity in the mitochondrial respiratory chain may negatively impact aerobic fitness. These findings are clinically relevant considering the main role of skeletal muscle oxidation in whole-body glucose disposal.

Large clinical trials related to type 1 diabetes have underlined the important role of the prolonged exposure of tissues to hyperglycemia in the pathogenesis of microvascular complications (1). Endothelial dysfunction can occur very early in the disease, that is, before overt vascular complications occur (2), hence altering metabolites and oxygen (O<sub>2</sub>) supplied to major tissues. Hyperglycemia may also

<sup>1</sup>EA7369 - URePSSS - Unité de Recherche Pluridisciplinaire Sport Santé Société, Univ. Lille, Univ. Artois, Univ. Littoral Côte d'Opale, Lille, France

<sup>2</sup>PRM Department, University Hospital of Lille, Lille, France

<sup>3</sup>Service de Chirurgie Générale et Endocrinienne, University Hospital of Lille, Lille, France

<sup>4</sup>UMR\_1190 Recherche Translationnelle sur le Diabète, Faculté de Médecine de Lille, INSERM, Lille, France

<sup>5</sup>Department of Physiology, EA 2689 and IFR 22, Lille, France

<sup>6</sup>Inter-university Laboratory of Human Movement Sciences EA7424, University of Savoie Mont Blanc, Chambéry, France

<sup>7</sup>Regional Hospital Center of Roubaix, Roubaix, France

<sup>8</sup>Réseau québécois de recherche sur la douleur, Université de Sherbrooke, Montreal, Quebec, Canada

<sup>9</sup>Department of Diabetology, Lille University Hospital, EA 4489, Lille, France

<sup>10</sup>Metabolic Diseases, Institut de Recherches Cliniques de Montréal, Montréal, Québec, Canada

Corresponding author: Elsa Heyman, [elsa.heyman@univ-lille.fr](mailto:elsa.heyman@univ-lille.fr)

Received 5 June 2019 and accepted 25 September 2019

Clinical trial reg. no. NCT02051504, [clinicaltrials.gov](http://clinicaltrials.gov)

This article contains Supplementary Data online at <http://care.diabetesjournals.org/lookup/suppl/doi:10.2337/dc19-1125/-/DC1>.

P.F. and S.T. share equal authorship.

© 2019 by the American Diabetes Association. Readers may use this article as long as the work is properly cited, the use is educational and not for profit, and the work is not altered. More information is available at <http://www.diabetesjournals.org/content/license>.

contribute to mitochondrial dysfunction, leading to impaired energy production in tissue (3).

Long before overt clinical complications of diabetes develop, oxygen supply and use can be challenged in daily-life situations such as aerobic exercise.  $\dot{V}O_{2\max}$ , determined during exhaustive incremental exercise, reflects the highest achievable outcome of the integrated pathway. It relies on the serial steps of oxygen transfer from the lungs to blood, the delivery of oxygenated blood through complicated branching networks of blood vessels, and the final use of oxygen in mitochondria in skeletal muscle. Several studies of type 1 diabetes have attempted to investigate some of these serial steps, albeit each with an isolated approach.

Although a low pulmonary diffusion capacity has been described in patients experiencing long-term diabetes complications (4), this does not appear as clearly in studies including uncomplicated patients (5,6), possibly because of the wide range of glycemic control among patients (7). The lungs represent a suitable target for hyperglycemia-induced vessel dysfunction and nonenzymatic glycation of collagen proteins because of their wide capillary network and the significant amount of connective tissue they contain. Concerning the second step of the oxygen supply process, we previously suggested normal arterial oxygenation but impaired exercise-induced muscle vasodilatation in uncomplicated patients with poorly controlled type 1 diabetes (8).

The ultimate step of O<sub>2</sub> utilization in the mitochondria has been only partially investigated in humans with type 1 diabetes. Noninvasive *in vivo* approaches using either near-infrared spectroscopy (NIRS) (i.e., muscle oxygen extraction) during aerobic exercise (8) or <sup>31</sup>P-MRS (i.e., calculating the maximal rate of ATP oxidative resynthesis) following a local isometric exercise (9–11) allowed the possibility to identify impaired muscle extraction, impaired mitochondrial use of oxygen, or both in patients with type 1 diabetes, and more so in those with a high HbA<sub>1c</sub> level. However, the exact causes for lower *in vivo* muscle oxygen extraction, use, or both cannot be inferred from these indirect, noninvasive approaches. Studies using muscle biopsies reported normal maximal oxidative enzymatic capacities in subjects with

type 1 diabetes (10,12–14). Nevertheless, enzymatic assays of the individual steps of the Krebs cycle,  $\beta$ -oxidation, and respiratory chain complexes cannot reveal how well all enzymes interact with each other and may mask some mitochondrial defects. In contrast, in permeabilized muscle fibers, *in situ* gold-standard experiments using a specific substrate/inhibitor titration approach provide detailed characterizations of functional, intact mitochondria in their normal intracellular position and assembly, preserving essential interactions (15). Monaco et al. (16) implemented this method to clarify mitochondrial (dys)function in type 1 diabetes and found decreased complex II-supported respiration. However, they did not test *in vivo* the putative consequences of this *ex vivo* defect.

Therefore, by combining multiple *in vivo* (particularly during exercise) and *ex vivo* (in muscle biopsies) approaches in patients and their strictly matched healthy control subjects, this study aims to gain further in-depth insight into the impact of type 1 diabetes and glycemic control on all steps of the integrated pathway for oxygen, from the atmosphere to the mitochondrial respiratory chain in skeletal muscle.

## RESEARCH DESIGN AND METHODS

This study was approved by the North Western IV regional ethics committee (no. EudraCT: 2009-A00746–51). Written consent was obtained from patients before their inclusion in the study. Sixteen patients (18–40 years of age) who had type 1 diabetes for at least 1 year and were free from microvascular and macrovascular complications were recruited (T1D group) (Table 1). They were compared with 16 healthy subjects with normal glucose tolerance, as checked with an oral glucose tolerance test OGTT and based on World Health Organization criteria (control [CON] group). The healthy subjects were selected (through verbal questioning) to strictly match each of the patients in the T1D group according to sex and to preestablished ranges or values for age ( $\pm 7$  years), BMI ( $\pm 4$  kg·m<sup>-2</sup>), moderate to vigorous leisure time physical activity level ( $\pm 1$  h·week<sup>-1</sup> when the patient's physical activity category was 0 h·week<sup>-1</sup>,  $\pm 2$  h·week<sup>-1</sup> for the

category of 2–6 h·week<sup>-1</sup>, and  $\pm 4$  h·week<sup>-1</sup> for the category of  $>6$  h·week<sup>-1</sup>; patient-control pairs were in the same category), and tobacco use (no smoking,  $<10$  cigarettes a day, and  $>10$  cigarettes a day). The matching of participants in terms of body composition and physical activity was checked further by using DEXA (Hologic, Inc.), the validated Modified Activity Questionnaire (17), and accelerometry (GT1M activity monitor; ActiGraph) over seven consecutive days.

Subjects came twice to the laboratory. We requested that they refrain from vigorous activity for 48 h before each visit and from using tobacco the morning of each visit.

During the first visit, patients with type 1 diabetes received their usual morning insulin bolus, and all subjects consumed a breakfast (based on their usual breakfast but containing a mean  $\pm$  SD of  $8.1 \pm 4.7\%$  protein,  $43.3 \pm 16.1\%$  lipid,  $48.6 \pm 15.2\%$  carbohydrate) that had been verified by a dietitian. Afterward, we assessed lung diffusion capacity for carbon monoxide (DL<sub>CO</sub>) and nitric oxide (DL<sub>NO</sub>). An incremental maximal cycling exercise was performed  $3.4 \pm 0.5$  h after breakfast, and respiratory gas exchange, arterial O<sub>2</sub> transport, skeletal muscle perfusion, and O<sub>2</sub> extraction were measured concomitantly. After the patient rested for 2 min while sitting on the cycle ergometer (Excalibur Sport; Lode, Groningen, the Netherlands) (baseline), the test started at 30 W and was increased by 20 W every 2 min until exhaustion; it was performed at an ambient temperature ( $18$ – $20^\circ\text{C}$ ).

On the morning of the second visit, after an 8-h overnight fast, a muscle biopsy was taken from the vastus lateralis to assess *ex vivo* intrinsic mitochondrial respiratory capacity in permeabilized skinned muscle fibers.

### Alveolar-Capillary Membrane Diffusion Capacity

DL<sub>CO</sub> was assessed following international guidelines; apnea was maintained for at least 8 s (gas sensor device, Medisoftware, Dinant, Belgium). In order to access the determinants of DL<sub>CO</sub> (i.e., membrane transfer capacity [D<sub>m</sub>] and capillary lung volume [ $\dot{V}_c$ ]), DL<sub>NO</sub> was evaluated further.

**Table 1—Participant characteristics**

|                                                              | T1D (n = 16)    | CON (n = 16)    |
|--------------------------------------------------------------|-----------------|-----------------|
| <b>Anthropometric and demographic data</b>                   |                 |                 |
| Sex                                                          |                 |                 |
| Male                                                         | 12              | 12              |
| Female                                                       | 4               | 4               |
| Age (years)                                                  | 28.5 ± 6.8      | 27.7 ± 6.6      |
| BMI (kg · m <sup>-2</sup> )                                  | 22.9 ± 2.2      | 23.1 ± 2.3      |
| Smoking status                                               |                 |                 |
| Smoker                                                       | 4               | 4               |
| Nonsmoker                                                    | 12              | 12              |
| Fat mass (%)                                                 | 19.8 ± 6.4      | 18.4 ± 5.6      |
| Fat mass of right leg (%)                                    | 20.7 ± 6.9      | 20.5 ± 7.8      |
| HbA <sub>1c</sub> (%)                                        | 8.3 ± 1.5**     | 5.2 ± 0.2       |
| HbA <sub>1c</sub> (mmol/mol)                                 | 67.0 ± 16.4**   | 33.0 ± 2.2      |
| Diabetes duration (years)                                    | 8.5 ± 5.2       | NA              |
| Insulin delivery (MDI/CSII)                                  |                 |                 |
| MDI                                                          | 10              | NA              |
| CSII                                                         | 6               | NA              |
| Insulin dose (units · kg <sup>-1</sup> · day <sup>-1</sup> ) | 0.67 ± 0.18     | NA              |
| <b>Physical activity†</b>                                    |                 |                 |
| Leisure activity per MAQ (h · week <sup>-1</sup> )           | 2.8 ± 3.3       | 3.0 ± 2.0       |
| Leisure activity per MAQ (MET · h · week <sup>-1</sup> )     | 17.6 ± 16.7     | 21.6 ± 15.5     |
| Total activity per MAQ (MET · h · week <sup>-1</sup> )       | 49.7 ± 93.7     | 45.0 ± 50.3     |
| MVPA per accelerometry (min · week <sup>-1</sup> )           | 232.2 ± 204.5   | 264.5 ± 128.5   |
| Sedentary time per accelerometry (h · day <sup>-1</sup> )    | 8.7 ± 2.2       | 10.9 ± 2.7      |
| <b>Usual daily macronutrient intake</b>                      |                 |                 |
| Total caloric intake (kcal · day <sup>-1</sup> )             | 1,992.6 ± 496.8 | 2,291.2 ± 489.5 |
| Protein (% of total calories)                                | 16.1 ± 3.1      | 16.3 ± 3.2      |
| Fat (% of total calories)                                    | 33.5 ± 7.0      | 36.3 ± 3.7      |
| Polyunsaturated fatty acid-to-saturated fatty acid ratio     | 0.3 ± 0.4       | 0.3 ± 0.4       |
| Cholesterol (mg · day <sup>-1</sup> )                        | 292.7 ± 146.1   | 335.3 ± 145.2   |
| Carbohydrate (% of total calories)                           | 50.4 ± 7.4      | 47.4 ± 5.2      |
| High glycemic index carbohydrate (% of total calories)       | 14.8 ± 5.3      | 17.1 ± 4.3      |
| Fiber intake (g · day <sup>-1</sup> )                        | 18.9 ± 4.8      | 19.0 ± 4.8      |

Data are mean ± SD or number of patients. Patients were free from microvascular (retinopathy, nephropathy, neuropathy) and macrovascular (high blood pressure, coronary disease, peripheral arteriopathy) complications. Fat mass was measured by DEXA. We also checked that the subcutaneous skinfold was <1.5 cm at the vastus lateralis to ensure the accuracy of NIRS measurements. Just before exercise, we measured HbA<sub>1c</sub> in EDTA anticoagulated blood (VARIANT II TURBO System; Bio-Rad); patients' HbA<sub>1c</sub> levels ranged between 5.8% (40 mmol/mol) and 10.7% (93 mmol/mol). Accelerometry data (collected by a GT1M activity monitor; ActiGraph) are displayed only for eight subjects per group because one healthy control subject and four patients with T1D did not strictly follow our recommendations (mainly, wearing the accelerometer during all waking hours), and the accelerometer devices worn by two patients with T1D were defective (no signal was recorded at the end of the week). We assessed usual daily macronutrient intake using a 3-day diary (including two weekdays and one weekend day), which was checked by a research-trained dietitian during an appointment with the participant. CSII, continuous subcutaneous insulin infusion; MAQ, Modifiable Activity Questionnaire; MDI, multiple daily insulin injections; MVPA, moderate to vigorous physical activity; NA, not applicable. Values are significantly different from those of the CON group, per the Wilcoxon test, at \*\**P* < 0.01. †*P* values (Wilcoxon test) for leisure activity (h · week<sup>-1</sup> and MET · h · week<sup>-1</sup>), total activity (MET · h · week<sup>-1</sup>), and MVPA (min · week<sup>-1</sup>, per accelerometry) were 0.53, 0.43, 0.64, and 0.26, respectively.

### Cardiopulmonary Response

Electrocardiography was performed and pulmonary gas exchanges were measured continuously throughout exercise using an Ergocard breath-by-breath system.  $\dot{V}O_{2\max}$  (the highest 15-s mean value upon termination of the test) was obtained for all subjects (Table 2).  $O_2$  pulse (the ratio of  $\dot{V}O_2$  to heart rate) throughout exercise was used as an indicator of stroke volume (18).

### Muscle Perfusion and $O_2$ Extraction

Subjects were equipped with an NIRS probe (OxyMon MkIII; Artinis Medical Systems, Gelderland, the Netherlands) to monitor, at 10 Hz, light absorption (two continuous wavelengths: 780 and 850 nm) across the vastus lateralis microvessels throughout exercise (8). Using the Beer-Lambert law and normalization to values from the baseline period, we determined changes in muscle oxygenation (oxyhemoglobin

[ $\Delta O_2Hb$ ]), deoxygenation due to  $O_2$  extraction (deoxyhemoglobin [ $\Delta HHb$ ]), and blood volume (total hemoglobin [ $\Delta THb$ ], the arithmetical sum of  $\Delta O_2Hb$  and  $\Delta HHb$ ) (19).

### Blood Analyses

Venous blood samples were taken through a catheter in the forearm while the subjects were at rest and during maximal exercise in order to measure plasma glucose, catecholamines, serum free insulin, free fatty acids, and glycerol. Likewise, at rest and during maximal exercise, microcapillary arterialized blood was collected from the earlobe in order to determine erythrocyte 2,3-diphosphoglycerate, lactate, pH,  $K^+$ ,  $PaCO_2$ , and components of arterial  $O_2$  ( $CaO_2$ ; i.e., arterial  $O_2$  saturation [ $SaO_2$ ],  $PaO_2$ , and hemoglobin). Details about the assays used are provided in the Table 2 footnote.

### Mitochondrial Respiratory Capacity in Muscle Fibers

A sample of vastus lateralis muscle, obtained by using the percutaneous Bergstrom technique after applying local anesthesia (2% lidocaine), was immediately placed in an ice-cold solution that mimics intracellular fluid (20). The muscle fibers were separated under a binocular microscope and permeabilized with saponin (50  $\mu$ g/mL) for 30 min, which allowed the sarcolemma to dissolve, but not the outer mitochondrial membrane. After being placed in a respiration buffer for 10 min (20) to wash out adenine nucleotides and creatine phosphate, skinned fibers were transferred in a 1-mL water-jacketed oxygraphic cell (Hansatech Instruments Ltd, Pentney, U.K.) equipped with a Clark electrode. Oxygen consumption (flux) reflects the first time derivative of the oxygen concentration in the respiration chambers, expressed as micromoles of  $O_2$  per minute per gram of dry weight. Relative contributions of respiratory complexes I, II, and IV (CI, CII, CIV), and of oxidation/phosphorylation, were assessed by sequentially adding substrates/inhibitors: glutamate-malate (10:5 mmol/L), generating  $NADH, H^+$  ( $\dot{V}_{GM}$ ); the phosphate acceptor ADP (2 mmol/L) ( $\dot{V}_{GM-ADP}$ ); the CI inhibitor rotenone (0.2  $\mu$ mol/L); the electron donor for CII, succinate (25 mmol/L) ( $\dot{V}_{succ}$ ); the uncoupler carbonyl cyanide *m*-chloro phenyl hydrazone (CCCP; 1  $\mu$ mol/L)

**Table 2—Aerobic fitness, alveolar-capillary exchanges, and circulatory and metabolic data during incremental maximal exercise**

|                                                                                                | T1D (n = 16)       | CON (n = 16)       | P values (mixed-model main effects or Wilcoxon test) <sup>a</sup> |
|------------------------------------------------------------------------------------------------|--------------------|--------------------|-------------------------------------------------------------------|
| <b>Aerobic fitness</b>                                                                         |                    |                    |                                                                   |
| $\dot{V}O_{2\max}$ (mL · min <sup>-1</sup> · kg <sup>-1</sup> )                                | 34.9 ± 7.2         | 40.7 ± 6.7         | <0.05                                                             |
| Maximal aerobic power (W)                                                                      | 207.5 ± 41.9       | 230.0 ± 45.6       | <0.05                                                             |
| Peak heart rate (bpm)                                                                          | 186.5 ± 10.6       | 188.4 ± 11.1       | NS                                                                |
| O <sub>2</sub> pulse (mL · beat <sup>-1</sup> )                                                |                    |                    | Exercise: <0.001, Group: NS, Interaction: NS                      |
| Rest                                                                                           | 4.4 ± 1.5          | 5.2 ± 1.6          |                                                                   |
| Peak                                                                                           | 14.5 ± 3.0         | 15.9 ± 3.8         |                                                                   |
| Peak RER                                                                                       | 1.2 ± 0.1          | 1.1 ± 0.1          | NS                                                                |
| Blood lactate at peak (mmol/L)                                                                 | 11.1 ± 3.0         | 11.4 ± 3.6         | NS                                                                |
| Peak rate of perceived exertion                                                                | 19.3 ± 0.9         | 18.7 ± 1.0         | NS                                                                |
| <b>Alveolar-capillary exchanges</b>                                                            |                    |                    |                                                                   |
| DL <sub>CO</sub> (mL · min <sup>-1</sup> · mmHg <sup>-1</sup> ) <sup>b</sup>                   | 31.8 ± 6.1         | 32.3 ± 5.8         | NS                                                                |
| DL <sub>NO</sub> (mL · min <sup>-1</sup> · mmHg <sup>-1</sup> )                                | 166.8 ± 25.7       | 174.0 ± 36.3       | NS                                                                |
| D <sub>m</sub> (mL · min <sup>-1</sup> · mmHg <sup>-1</sup> )                                  | 84.6 ± 13.0        | 88.3 ± 18.4        | NS                                                                |
| V <sub>c</sub> (mL)                                                                            | 92.6 ± 22.9        | 95.3 ± 21.0        | NS                                                                |
| <b>Arterial O<sub>2</sub> transport</b>                                                        |                    |                    |                                                                   |
| PaO <sub>2</sub> (mmHg)                                                                        |                    |                    | Exercise: <0.001, Group: <0.01, Interaction: NS                   |
| Rest                                                                                           | 93.8 ± 6.1         | 99.7 ± 10.7        |                                                                   |
| Peak                                                                                           | 99.5 ± 6.7†        | 110.9 ± 11.7††     |                                                                   |
| SaO <sub>2</sub> (%)                                                                           |                    |                    | Exercise: <0.01, Group: NS, Interaction: NS                       |
| Rest                                                                                           | 98.3 ± 1.1         | 98.5 ± 0.6         |                                                                   |
| Peak                                                                                           | 97.4 ± 0.6         | 98.1 ± 0.8         |                                                                   |
| Hemoglobin (g · dL <sup>-1</sup> )                                                             |                    |                    | Exercise: <0.001, Group: NS, Interaction: <0.05                   |
| Rest                                                                                           | 14.9 ± 1.2         | 15.0 ± 1.3         |                                                                   |
| Peak                                                                                           | 16.7 ± 1.8††       | 15.5 ± 1.6         |                                                                   |
| CaO <sub>2</sub> (mL · 100 mL <sup>-1</sup> )                                                  |                    |                    | Exercise: <0.001, Group: NS, Interaction: <0.05                   |
| Rest                                                                                           | 20.4 ± 1.8         | 20.5 ± 1.7         |                                                                   |
| Peak                                                                                           | 22.7 ± 2.3††       | 21.2 ± 2.2         |                                                                   |
| <b>Factors able to shift the O<sub>2</sub>-Hb dissociation curve and vasoactive substances</b> |                    |                    |                                                                   |
| pH                                                                                             |                    |                    | Exercise: <0.001, Group: NS, Interaction: NS                      |
| Rest                                                                                           | 7.41 ± 0.04        | 7.42 ± 0.01        |                                                                   |
| Peak                                                                                           | 7.26 ± 0.04        | 7.29 ± 0.08        |                                                                   |
| PaCO <sub>2</sub> (mmHg)                                                                       |                    |                    | Exercise: <0.001, Group: NS, Interaction: NS                      |
| Rest                                                                                           | 38.6 ± 2.4         | 37.5 ± 3.9         |                                                                   |
| Peak                                                                                           | 31.3 ± 3.2         | 29.6 ± 4.3         |                                                                   |
| 2,3-DPG (mmol · mL <sup>-1</sup> red blood cells)                                              |                    |                    | Exercise: NS, Group: <0.05, Interaction: NS                       |
| Rest                                                                                           | 3.97 ± 0.89        | 3.45 ± 0.68        |                                                                   |
| Peak                                                                                           | 4.11 ± 0.88        | 3.71 ± 0.70        |                                                                   |
| Serum free insulin (pmol · L <sup>-1</sup> )                                                   |                    |                    | Exercise: NS, Group: <0.001, Interaction: NS                      |
| Rest                                                                                           | 344.4 ± 361.6      | 76.0 ± 40.2        |                                                                   |
| Peak                                                                                           | 367.4 ± 442.0      | 73.2 ± 38.7        |                                                                   |
| Plasma epinephrine (pmol · L <sup>-1</sup> )                                                   |                    |                    | Exercise: <0.001, Group: NS, Interaction: NS                      |
| Rest                                                                                           | 627.2 ± 425.4      | 561.8 ± 387.2      |                                                                   |
| Peak                                                                                           | 1,499.8 ± 1,090.8  | 1,478.0 ± 796.3    |                                                                   |
| Plasma norepinephrine (pmol · L <sup>-1</sup> )                                                |                    |                    | Exercise: <0.001, Group: NS, Interaction: NS                      |
| Rest                                                                                           | 2,211.8 ± 922.6    | 2,726.3 ± 2,182.3  |                                                                   |
| Peak                                                                                           | 11,260.3 ± 5,281.2 | 12,519.9 ± 4,743.0 |                                                                   |

Continued on p. 213

Table 2—Continued

|                                                 | T1D (n = 16)  | CON (n = 16)   | P values (mixed-model main effects or Wilcoxon test) <sup>a</sup> |
|-------------------------------------------------|---------------|----------------|-------------------------------------------------------------------|
| Arterial K <sup>+</sup> (mmol·L <sup>-1</sup> ) |               |                | Exercise: <0.001, Group: NS, Interaction: NS                      |
| Rest                                            | 4.9 ± 0.4     | 4.6 ± 0.5      |                                                                   |
| Peak                                            | 5.9 ± 1.0     | 5.4 ± 0.8      |                                                                   |
| Metabolic data                                  |               |                |                                                                   |
| Plasma glucose (mmol·L <sup>-1</sup> )          |               |                | Exercise: <0.05, Group: <0.001, Interaction: NS                   |
| Rest                                            | 7.3 ± 2.9*    | 5.1 ± 0.6      |                                                                   |
| Peak                                            | 8.3 ± 2.1*    | 6.4 ± 0.8††    |                                                                   |
| Plasma free fatty acids (mmol·L <sup>-1</sup> ) |               |                | Exercise: NS, Group: <0.05, Interaction: NS                       |
| Rest                                            | 0.297 ± 0.182 | 0.357 ± 0.190  |                                                                   |
| Peak                                            | 0.207 ± 0.104 | 0.350 ± 0.175  |                                                                   |
| Plasma glycerol (mg·L <sup>-1</sup> )           |               |                | Exercise: <0.001, Group: <0.05, Interaction: NS                   |
| Rest                                            | 2.55 ± 1.37   | 2.64 ± 1.45    |                                                                   |
| Peak                                            | 5.44 ± 2.83†† | 7.86 ± 3.31††† |                                                                   |

Values are mean ± SD unless otherwise indicated. Plasma (fluorinated) glucose was measured with a hexokinase enzymatic assay on a modular automatic analyzer; serum free insulin, with a noncompetitive radioimmunoassay (Cisbio); plasma catecholamines (heparin, metabisulfite), with high-performance liquid chromatography; serum free fatty acids and glycerol, with colorimetric assays (reagents from Randox Laboratories); arterialized (a vasodilatory pomade was applied 5 min before) erythrocyte 2,3-diphosphoglycerate (2,3-DPG), with spectrophotometry (Sigma-Aldrich); arterialized pH, K<sup>+</sup>, and PaCO<sub>2</sub>, by potentiometry; SaO<sub>2</sub> and hemoglobin (Hb), by spectrophotometry; and PaO<sub>2</sub> and lactate, by amperometry on an ABL800 FLEX blood gas analyzer. Peak, at exhaustion from the incremental exercise; RER, respiratory exchange ratio; Rest, at rest just before the exercise. <sup>a</sup>Main effects from mixed models include P values for an exercise effect (Exercise), a group effect (Group), and an exercise × group interaction (Interaction). Post hoc analyses for a group effect found values were significantly different from those of the control subjects at \*P < 0.05; post hoc analyses for a time effect found that values were significantly different from those at rest at †P < 0.05, ††P < 0.01, or †††P < 0.001. <sup>b</sup>Corrected by individual hemoglobin concentrations.

( $\dot{V}_{\text{Succ-CCCP}}$ ); the CIII inhibitor antimycin A (2.5  $\mu\text{mol/L}$ ); and the artificial electron donor to cytochrome c, *N,N,N',N'*-tetramethyl-*p*-phenylenediamine dihydrochloride (TMPD)–ascorbate (0.5:2.0 mmol/L). CIV capacity was assessed as an isolated step of the respiratory chain ( $\dot{V}_{\text{TMPD}}$ ). The respiratory control ratio (RCR;  $\dot{V}_{\text{GM-ADP}}/\dot{V}_{\text{GM}}$ ) was calculated as an index of coupling efficiency between oxidation (O<sub>2</sub> consumption) and phosphorylation (of ADP to ATP) with CI substrates.  $\dot{V}_{\text{Succ}}/\dot{V}_{\text{GM-ADP}}$  and  $\dot{V}_{\text{TMPD}}/\dot{V}_{\text{GM-ADP}}$  were calculated as internal normalizations in order to assess specific CII and CIV relative capacities independently of mitochondrial content. Mitochondrial capacities to oxidize carbohydrates and fatty acids were assessed in separate samples in the respiration buffer, in the presence of ADP (2 mmol/L) and malate (2 mmol/L), by sequentially adding pyruvate (1 mmol/L;  $\dot{V}_{\text{PY}}$ ) and palmitoyl-carnitine (135  $\mu\text{mol/L}$ ;  $\dot{V}_{\text{PC}}$ ). Maximal citrate synthase activity (expressed per milligrams of protein) was assessed by using spectrophotometric assay of muscle samples that had been immediately frozen in liquid nitrogen and preserved at  $-80^{\circ}\text{C}$ .

### Statistical Analyses

Statistical analyses were performed with IBM SPSS 19.0 software. Results are

reported as the mean ± SD unless otherwise indicated. Nonrepeated data were compared between groups with the Wilcoxon matched-pairs test. Repeated data (normally distributed according to the Shapiro-Wilk test) were compared between groups (fixed effect) and according to exercise (fixed effect: rest vs. peak exercise or, for NIRS, ventilatory expiratory flow [ $\dot{V}_{\text{E}}$ ], and O<sub>2</sub> pulse outcomes, relative exercise intensities with a value for every 10%  $\dot{V}\text{O}_{2\text{max}}$ , as well as absolute exercise intensities [Watts]) using linear mixed models for repeated measurements. If significant main effects or interactions were found, Bonferroni post hoc comparisons were applied. Correlations were tested using the Spearman  $\rho$ .  $P < 0.05$  was considered statistically significant.

### RESULTS

Demographic and anthropometric data did not differ between groups (Table 1). The T1D group had lower  $\dot{V}\text{O}_{2\text{max}}$  (Table 2) than the CON group despite comparable levels of habitual physical activity (Table 1) and comparable heart rates at exhaustion. Plasma glucose increased during exercise in both groups, with overall higher values in the T1D group (Table 2). No hypoglycemia occurred during exercise in patients in the T1D group.

### Alveolar-Capillary Diffusion

$\text{DL}_{\text{CO}}$ , as well as its determinants  $D_m$  and  $\dot{V}_c$ , did not differ between groups (Table 2).  $\dot{V}_c$  is influenced by the number of pulmonary capillaries in contact with ventilated alveoli, which increases during exercise because pulmonary blood flow and lung volumes increase. O<sub>2</sub> pulse (indirectly reflecting stroke volume) and  $\dot{V}_c$  and its components (tidal volume, respiratory rate) increased throughout exercise, and we found no intergroup differences (in mixed models, the group effect and the exercise × group interaction were not significant; Table 2 for O<sub>2</sub> pulse; data not shown for  $\dot{V}_c$ ).

### Oxygen Arterial Transport

Although PaO<sub>2</sub> was slightly lower in patients in the T1D group than in subjects in the CON group, CaO<sub>2</sub> and, correspondingly, Hb concentration were not impaired; these increased even more during exercise in the T1D group than in the CON group (Table 2).

### Muscle Perfusion ( $\Delta\text{THb}$ ) and O<sub>2</sub> Extraction ( $\Delta\text{HHb}$ )

Despite higher serum insulin and normal catecholamine concentrations (Table 2), the levels of and increases in  $\Delta\text{THb}$  were lower among patients in the T1D group than among subjects in the CON group, especially at exercise intensities above

30%  $\dot{V}O_{2\max}$ . The levels of and increases in  $\Delta\text{HHb}$  were lower in the T1D group than in the CON group, particularly at exercise intensities above 50%  $\dot{V}O_{2\max}$ . This occurred in spite of higher 2,3-diphosphoglycerate concentrations in the T1D group (Fig. 1 and Table 2).

### Use of O<sub>2</sub> in Muscle Mitochondria

Citrate synthase activity was similar between the T1D and CON groups ( $92 \pm 47$  and  $85 \pm 31$  pmol·min<sup>-1</sup>·mg protein<sup>-1</sup>, respectively). Oxygen flux with the mitochondrial substrates  $\dot{V}_{\text{GM-ADP}}$  and  $\dot{V}_{\text{Pyr}}$  (electrons through CI to CIII, CIV),  $\dot{V}_{\text{Succ}}$  (electrons through CII to CIII, CIV), and  $\dot{V}_{\text{PC}}$  (electrons through CI and CII to CIII, CIV) did not differ between groups (Fig. 2). The comparable  $\dot{V}_{\text{PC}}$  and  $\dot{V}_{\text{Pyr}}$  measured in vitro in muscle, were in accordance with estimated in vivo whole-body lipid and carbohydrate oxidation rates throughout exercise (i.e., comparable  $\dot{V}O_2$ ; data not shown). Alterations in neither ATP synthase ( $\dot{V}_{\text{Succ-CCCP}}$  minus  $\dot{V}_{\text{Succ}}$ ; data not shown), global electron transport system capacity (from CII:  $\dot{V}_{\text{Succ-CCCP}}$ ), nor oxidation/phosphorylation coupling efficiency (RCR) were noticeable in patients in the T1D group. However, specific examination of the various mitochondrial chain complexes revealed impairment in the CIV relative capacity ( $\dot{V}_{\text{TMPD}}/\dot{V}_{\text{GM-ADP}}$ ) in patients in the T1D group, whereas the CII relative capacity ( $\dot{V}_{\text{Succ}}/\dot{V}_{\text{GM-ADP}}$ ) was unaltered.

It is noteworthy that in patients in the T1D group, diabetes duration correlated negatively with the CIV relative capacity ( $\dot{V}_{\text{TMPD}}/\dot{V}_{\text{GM-ADP}}$ ;  $r = -0.59$ ;  $P < 0.05$ ), and HbA<sub>1c</sub> tended to correlate negatively with CIV capacity ( $\dot{V}_{\text{TMPD}}$ ;  $r = -0.47$ ;  $P < 0.07$ ). Moreover, longer diabetes duration and lower CIV relative capacity were predictors (covariates in mixed models) of smaller increases in  $\Delta\text{HHb}$  with exercise intensity (interaction with exercise intensity,  $e = -0.004$  [ $P < 0.001$ ] and  $e = +0.02$  [ $P < 0.001$ ], respectively). The other steps of O<sub>2</sub> transport from the lungs to mitochondria were not significantly associated with HbA<sub>1c</sub> or diabetes duration.

In the CON group,  $\dot{V}_{\text{TMPD}}$  correlated with  $\dot{V}O_{2\max}$  and maximal aerobic power ( $r > 0.64$ ;  $P < 0.01$ ).

### CONCLUSIONS

The novelty of this study resides in the examination of all steps of the pathway

of oxygen, from air to mitochondria, by combining both in vivo and ex vivo approaches in patients with uncomplicated type 1 diabetes and strictly matched healthy control subjects (Supplementary Fig. 1). We showed that alveolar-capillary membrane diffusion capacity and arterial O<sub>2</sub> transport are normal at this stage of the disease. However, we confirmed that these patients display blunted perfusion and oxygen extraction in microvessels from active skeletal muscle at moderate to maximal exercise intensities. The defect in oxygen extraction occurred despite an overall normal intrinsic mitochondrial maximal respiratory capacity. The only detectable alteration in the mitochondrial chain appeared at the level of CIV, and this was more pronounced among patients with poorly controlled, long-standing diabetes.

Considering our results and the very few studies that matched their patient and control populations on physical activity levels (6,21), it seems that DL<sub>CO</sub>, D<sub>m</sub>, and  $\dot{V}_c$  are not impaired and do not correlate with glycemic control in patients with uncomplicated type 1 diabetes. Thus, thickening of the pulmonary capillary basal lamina and dysfunction of the pulmonary vasculature are probably still absent, or are present but have no detectable consequences, when clinical complications are not overt. It is, however, still possible that some subtle alterations are already present in the participants with type 1 diabetes, as suggested by the reduced PaO<sub>2</sub>. Notwithstanding, CaO<sub>2</sub> was adequately maintained throughout exercise in patients in the T1D group. Subtle alterations in lung function might have been balanced by a higher affinity for O<sub>2</sub> when hemoglobin is glycated (22), leading to normal SaO<sub>2</sub>. It could also have been the case in a previous study in which patients with long-standing type 1 diabetes displayed altered DL<sub>CO</sub> and D<sub>m</sub> in a more demanding situation (intense exercise in a hypoxic environment) without any repercussions for SaO<sub>2</sub> (6).

Although the first steps of oxygen supply that occur in the lungs and arteries resulted in normal arterial O<sub>2</sub> transport throughout exercise in patients in the T1D group, the subsequent steps in muscle microvessels seemed to be impaired. Very few studies have investigated exercise-induced muscle

vasoreactivity in type 1 diabetes. Rissanen et al. (23) reported reduced muscle blood flow in the active leg of adults with type 1 diabetes; this reduced flow occurred at peak intensity during an incremental cycling exercise and was measured by using an indirect method based on deoxygenation patterns (% $\Delta\text{HHb}$ ) and theoretical values of peripheral arterial-venous O<sub>2</sub> difference. In this work and in our previous study (8), we also highlighted an impaired exercise-induced increase in muscle blood volume in response to maximal incremental exercise.

Admittedly, cardiac output is one determinant of muscle perfusion (24). We used an indirect marker of stroke volume, which seemed to be normal throughout exercise in patients in the T1D group. The available literature related to cardiac output in uncomplicated patients with type 1 diabetes and physical activity-matched control subjects conflicts: one report highlights low cardiac output during submaximal exercise in adolescents (25), whereas others describe no intergroup differences in adults at submaximal (23) or peak (6,10) exercise. Even if the involvement of central cardiovascular factors cannot be totally disregarded in relation to lower muscle blood volume, the latter is probably also triggered by peripheral microvascular alterations. Supporting this hypothesis, Pichler et al. (26) found an impaired increase in blood flow in the brachioradialis muscle in children with type 1 diabetes during the recovery period after a short rhythmic handgrip test, a local exercise involving a very small muscle mass and wherein muscle blood flow is unlikely to be limited by cardiac output.

Following the few previous studies of exercise-induced muscle microvascular reactivity limits in type 1 diabetes (8,23), here we go a step further into understanding putative underpinning mechanisms. Although their relative contributions remain controversial, it is well recognized that arterial, capillary, and venous compartments all participate in the microvascular THb signal in muscle (19). Within muscle arterioles, although norepinephrine is a vasoconstrictor devoted to regulating blood pressure, epinephrine, as well as insulin (27), can promote endothelial nitric oxide production and hence vasorelaxation. In our study, although plasma catecholamines



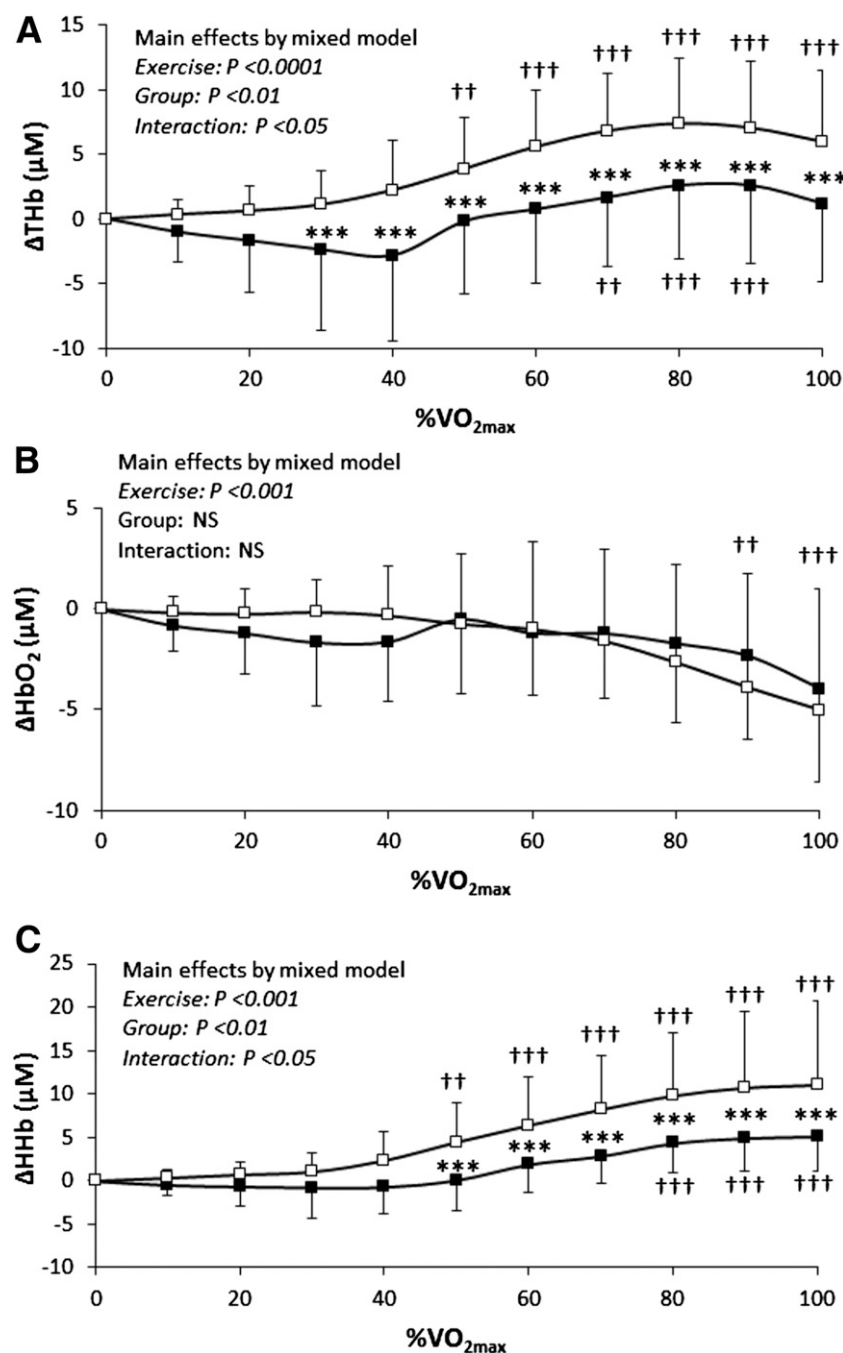

**Figure 1**—Recordings from NIRS of vastus lateralis, showing changes in  $\Delta\text{THb}$  (A),  $\Delta\text{O}_2\text{Hb}$  (B), and  $\Delta\text{HHb}$  (C). The 40-mm interspersed emitter-detector pair was placed on the belly of the right vastus lateralis muscle. Changes in NIRS outcomes are displayed according to exercise intensities expressed as relative values ( $\%\text{VO}_{2\text{max}}$ ). Mixed models revealed almost identical results when studying NIRS according to absolute exercise intensities (i.e., expressed as absolute work rates in Watts; data not shown). Values are the mean  $\pm$  SE. ■, patients in the T1D group; □, healthy subjects in the CON group. Post hoc analyses for the group effect were significantly different from control subjects at  $***P < 0.001$ . Post hoc analyses for time effect were significantly different from those at rest at  $††P < 0.01$  and  $†††P < 0.001$ .

were comparable, serum free insulin was markedly elevated in patients in the T1D group. The high insulin concentrations, concomitant with high plasma glucose levels, reflect the well-described state of insulin resistance in type 1 diabetes,

which could presumably also apply at the endothelial cell level, as already proven in obesity and type 2 diabetes (27). This might explain the impaired muscle vasoreactivity despite the higher insulin concentrations observed in the

T1D group. Of note, the higher plasma glucose levels observed throughout exercise in the T1D group can certainly not explain the concomitant smaller increases in regional blood volume. Dye et al. (28) indeed found an inverse effect with increased postocclusive reactive hyperemia-induced vasodilatation under hyperglycemic conditions ( $200 \text{ mg}\cdot\text{dL}^{-1}$  glucose) in patients with type 1 diabetes. The other vasoactive moieties that we considered ( $\text{PaCO}_2$ ,  $\text{K}^+$ , pH) did not significantly differ between the two groups. Although muscle microvascular density is presumably normal in patients with uncomplicated type 1 diabetes (10,16), further studies are needed to fully determine the molecular mechanisms of the reduced exercise-induced muscle vasoreactivity. Although Fayh et al. (29) hypothesized that nitric oxide production is not involved in the low blood flow after exercise that they observed in young adults with type 1 diabetes, this result is worth confirming, as they did not distinguish nitrates from nitrites in their measurements. Only nitrites are known to sensitively reflect acute changes in nitric oxide synthase activity (30).

Because muscle  $\text{O}_2$  and high-energy phosphate stores are small, any sustained elevation in ATP turnover in active skeletal muscle during exercise requires that the rate of  $\text{O}_2$  delivery to muscle mitochondria precisely match the muscle's  $\text{O}_2$  requirements. In this study, the last step of the delivery of oxygen to skeletal muscle before its utilization, that is, muscle  $\text{O}_2$  extraction ( $\Delta\text{HHb}$ ), was significantly blunted in response to increased exercise intensity in the T1D group. This was more pronounced in the case of long-standing diabetes, and it occurred despite higher erythrocyte 2,3-diphosphoglycerate concentrations. As previously suggested (8), this result, obtained from a sample with rather poorly controlled diabetes, could be partly explained by an impairment of oxyhemoglobin dissociation near active skeletal muscle, induced by the greater affinity of  $\text{HbA}_{1c}$  for  $\text{O}_2$  than that of nonglycated hemoglobin for  $\text{O}_2$  (22). It is noteworthy that adjustments in 2,3-diphosphoglycerate concentrations compensatory to increased  $\text{HbA}_{1c}$  formation in type 1 diabetes may be insufficient to maintain normal erythrocyte  $\text{O}_2$  dissociation (31).

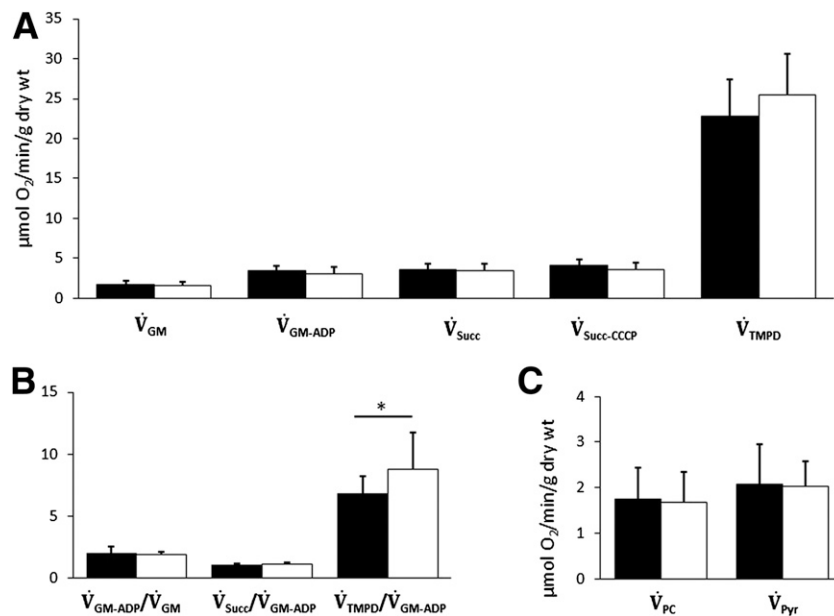

**Figure 2**—Mitochondrial respiratory capacity in saponin skinned fibers of the vastus lateralis muscle. **A:** Step-by-step analysis of various segments of the respiratory chain.  $\dot{V}_{GM}$ , basal adenylate-free leak CI respiration: O<sub>2</sub> flux with glutamate–malate (10:5 mmol/L) to assess O<sub>2</sub> spent in order to maintain the membrane potential, with electron flow from malate dehydrogenase–produced NADH, H<sup>+</sup> going through CI, CIII, and CIV, that is, respiration due to protons leaking and slipping back into the mitochondrial matrix, cation cycling, and, to a small extent, an electron leak induced by reactive oxygen species production (malate at 2 mmol/L is used to initiate the Krebs cycle while redirecting 2-oxoglutarate outside of the mitochondria, instead of producing succinate).  $\dot{V}_{GM-ADP}$ , oxidative phosphorylation (OXPHOS) capacity from CI (through CIII and CIV): O<sub>2</sub> flux after the phosphate acceptor ADP was added at a saturating concentration (2 mmol/L).  $\dot{V}_{Succ}$ , OXPHOS capacity from CII (through CIII and CIV): O<sub>2</sub> flux after the CI inhibitor rotenone (0.2 μmol/L) and then the electron donor for complex II, succinate (25 mmol/L), were sequentially added in order to assess mitochondrial respiration from FADH<sub>2</sub>.  $\dot{V}_{Succ-CCCP}$ , global electron transport system capacity from CII and capacity of succinate dehydrogenase: O<sub>2</sub> flux after the uncoupler CCCP (1 μmol/L) was added, thereby bypassing the control of the phosphorylation system, in order to assess uncoupled O<sub>2</sub> flux with an electron supply from FADH<sub>2</sub>.  $\dot{V}_{TMPD}$ , CIV capacity: O<sub>2</sub> flux after the CIII inhibitor antimycin A (2.5 μmol/L) and then TMPD–ascorbate (0.5:2 mmol/L, as an artificial electron donor to cytochrome c) were sequentially added. **B:** RCRs.  $\dot{V}_{GM-ADP}/\dot{V}_{GM}$ , oxidation-phosphorylation coupling efficiency (RCR): ratio of the respiration rate before and the respiration rate after a saturating concentration of ADP was added.  $\dot{V}_{Succ}/\dot{V}_{GM-ADP}$ : specific CII relative capacities.  $\dot{V}_{TMPD}/\dot{V}_{GM-ADP}$ : specific CIV relative capacities. **C:** Mitochondrial capacities to oxidize carbohydrates and fatty acids.  $\dot{V}_{Pyr}$ , mitochondrial capacity to oxidize carbohydrates.  $\dot{V}_{PC}$ , mitochondrial capacity to oxidize fatty acids. These were assessed in separate samples in the respiration buffer in the presence of ADP (2 mmol/L) and malate (2 mmol/L). Pyruvate (1 mmol/L; an index of glucose oxidation) and palmitoyl-carnitine (135 μmol/L; undergoing β-oxidation) were added sequentially. All respiratory measurements were performed simultaneously, in duplicate, at 22°C under continuous stirring, and in the presence of saturating concentrations of the substrates at an initial O<sub>2</sub> concentration of ~220 μmol/L. Black bars represent patients with type 1 diabetes; white bars represent the healthy control subjects. Results are the mean ± SD. \**P* < 0.05 vs. the control subjects.

Besides the putative reduced oxyhemoglobin dissociation, the influence of impaired mitochondrial O<sub>2</sub> use on the blunted ΔHHb signal cannot be ruled out. To clarify the partition between both mechanisms, we combined, through an integrated approach, an ex vivo analysis of muscle biopsies with in vivo exploration of O<sub>2</sub> extraction during exercise. In the T1D group, no major alteration occurred in mitochondrial oxidative capacity. Mitochondrial content (citrate synthase activity) was

comparable in both groups (T1D and CON), as previously suggested (12,13). We also found normal overall intrinsic mitochondrial maximal respiratory capacity with the various mitochondrial substrates. Of note, although the ex vivo intrinsic capacity of mitochondria to oxidize palmitate and the in vivo free fatty acid oxidation rate were normal in patients in the T1D group, lipolysis might be blunted, as suggested by the lower amount of circulating glycerol at rest and during maximal exercise. The latter

observation must be considered in conjunction with the concomitant higher circulating insulin among patients in the T1D group, because insulin is a potent inhibitor of lipolysis.

To date, to our knowledge only one other research group (16) has provided insight into mitochondrial oxidative capacities in functional intact mitochondria under in situ-like conditions in type 1 diabetes. In line with our results, albeit in a smaller sample of subjects (11 patients and 8 healthy subjects), Monaco et al. (16) did not observe any alteration in CI-supported mitochondrial respiration, regardless of the substrate used. However, in contrast to our results and to those of previous studies examining isolated maximal capacity of succinate dehydrogenase (12,14), Monaco et al. observed a lower capacity for CII-supported respiration by succinate. In the latter study, BMI was higher in the patients with type 1 diabetes than in the healthy control subjects. This intergroup difference might partly explain the discordance with our results about CII-supported respiration capacity. Diet-induced obesity in animals has indeed been shown to decrease the rate of CII substrate-driven ATP synthesis in cardiac muscle (32), and weight loss in obese humans is associated with improvement in CII activity in adipose tissue (33). Accordingly, by further testing correlations between participant characteristics and mitochondrial respiration among patients with type 1 diabetes, we found that fat mass percentage, as objectively measured by DEXA, inversely correlated with  $\dot{V}_{Succ}$  (*r* = −0.51; *P* < 0.05).

CIV of the electron transport chain was not specifically investigated by Monaco et al. (16), although it represents a main site for mitochondrial diseases (34). CIV is the terminal component of the mitochondrial respiratory chain and is essential for mitochondrial energy transduction. It catalyzes electron transfer from cytochrome c to molecular oxygen, generating a proton gradient required for ATP synthesis. Strikingly, the relative contribution of CIV was significantly reduced (by ~29%) in patients with type 1 diabetes in our study—mostly in those with longer diabetes duration and higher HbA<sub>1c</sub> levels. The underlying mechanisms of such an impairment remain to be investigated, but



chronic hyperglycemia-induced oxidative stress may be part of the picture. It is well known that excessive glucose provision to mitochondria elevates production of reactive oxygen species (3), and as demonstrated in bovine heart muscle, CIV represents an important target for oxidative damage (35), thereby contributing to mitochondrial dysfunction (36). Particularly in type 1 diabetes, the low insulin concentration in the portal circulation, due to the peripheral mode of insulin administration, shifts glucose metabolism to produce excessive hepatic glucose, while skeletal muscle is forced to accept the high glucose load in a context of high peripheral circulating insulin (37).

Studies closely mimicking in vivo conditions by using saponin-permeabilized human muscle fibers have demonstrated that CIV exerts tight control over respiration, with only a low excess capacity of cytochrome oxidase. This tight control by CIV is even more pronounced in cases of low physiological oxygen concentrations (38), which can explain the pathological phenotype of mild cytochrome c oxidase deficiencies in mitochondrial myopathies (34). Consistent with this, the relative CIV capacity defect in patients in the T1D group in our study may have implications for aerobic fitness: the lower CIV capacity significantly predicted the blunted exercise-induced increase in muscle  $O_2$  extraction in the T1D group, whereas higher CIV capacity was associated with higher aerobic fitness in the CON group.

Last, although changes in skeletal muscle have been intensively studied in rodent models of type 1 diabetes (39), further investigation in humans is required in order to supplement our mechanistic understanding of observed mitochondrial dysfunctions. Rodent models of diabetes cannot be directly transposed to humans because tight blood glucose control through multiple insulin injections is virtually impossible to achieve over long periods of time in animals. In particular, assessing supra-molecular interactions of CIV with other complexes might be of great value. The structural and functional organization of the electron transport chain could indeed change from freely moving structures to assembled ones called supercomplexes, which are believed to increase transport efficiency and limit the production of reactive oxygen species. In a mouse

model of type 1 diabetes mellitus, overexpression of mitofillin, a protein that affects supercomplex assembly, was able to restore mitochondrial function (40).

In summary, maximal aerobic exercise could represent a physiological way to identify possible subclinical defects in the serial steps responsible for appropriately adjusting  $O_2$  delivery and subsequently utilizing  $O_2$  in mitochondria. This investigation revealed that relatively young patients with type 1 diabetes display blunted muscle microvascular reactivity to exercise along with a lower relative capacity of CIV in the mitochondrial respiratory chain. Early microvascular and muscle oxidative capacity dysregulations, in addition to their negative effects on aerobic fitness—a strong predictor of cardiovascular risk—could also have deep long-term consequences on the primary determinants of diabetes complications. Defects in blood and nutrient delivery to skeletal muscle, as well as altered subsequent mitochondrial oxidation, can indeed directly affect glycemic and lipid profiles. Skeletal muscle is actually known to be responsible for most insulin-stimulated whole-body glucose disposal and for roughly half of non-insulin-mediated glucose uptake in the presence of hyperglycemia (41). It is also quantitatively the most dominant tissue with respect to lipid metabolism. In the face of these defects, implementing non-pharmacological interventions such as specific exercise training programs might be of the utmost clinical importance, especially because skeletal muscle is a highly malleable tissue with the capacity to metabolically adapt in response to contractile activity. The challenge of future studies will be to ensure that these defects in peripheral tissue perfusion—observed at even light to moderate exercise intensities—could be improved by training and euglycemia.

**Acknowledgments.** The authors thank Dr. C. Fermon, Professor M. Lepeut (CETRADIMN, Roubaix Regional Hospital), Dr. F. Baudoux, and Professor A. Vamborgue (Diabetes Department, Lille University Hospital) for helping to recruit patients; P. Hincker, Dr. P. Rasoamanana, I. Rougeaux, N. Waucquier, and Professor D. Deplanque (Clinical Investigation Center, Lille University Hospital), P. Gelé and B. Accart (Biological Resource Center, Lille University Hospital), E. Lespagnol, L. Vanneste, F. Dehaut, M. Pawlak-Chaouch, F. Prieur, P. Mucci, and G. Baquet

(University of Lille), A. Watry and M. Nunes-Leclercq (Diabetes Department, Lille University Hospital), and E. Devemy, M. Dominikowski, K. Mimeche, and M. Leclercq (Pulmonary Function Testing Department, Lille University Hospital) for providing laboratory assistance; P. Maboudou, A.-F. Dessein, N. Rouaix, P. Pigny, M.J. Lepoutre, M. Michiels, and L. Sapyn (Laboratory of Biochemistry and Endocrinology, Lille University Hospital) for performing blood analyses; C. Lepretre (Clinical Research Direction, Lille University Hospital), J. Gamain and S. Cochet (University of Lille) for providing administrative management; and B. Heyman (University of Rennes) and E. Nguyen and M. Raffray (University of Montreal) for revising the English.

**Funding.** This study was supported by grants obtained by E.H. and P.F. from Société Francophone du Diabète (grant ALFEDIAM-RocheDiagnostics 2009), from Programme Hospitalier de Recherche Clinique (PHRC 2010), and from Région Nord pas de Calais - Hauts de France (Programme Emergent 2013).

**Duality of Interest.** No potential conflicts of interest relevant to this article were reported.

**Author Contributions.** E.H. conceived the experiments, analyzed data, and wrote the manuscript. F.D. performed the experiments, analyzed data, and reviewed the manuscript. V.W., R.C., P.B., J.A., E.L., G.M., and A.C., performed the experiments and reviewed the manuscript. R.M. and S.B. conceived the experiments and reviewed the manuscript. A.D. recruited patients and reviewed the manuscript. P.F. conceived the experiments, recruited patients, and reviewed the manuscript. E.H. is the guarantor of this work and, as such, had full access to all data in the study and takes responsibility for the integrity of the data and the accuracy of the data analysis.

**Prior Presentation.** Some preliminary data related to this study were presented at the annual congress of Société Francophone du Diabète, Bordeaux, France, 24–27 March 2015. A related abstract was also published in *Diabetes & Metabolism* 2015;41(Suppl. 1):A5 (Abstract O18).

## References

- Hainsworth DP, Bebu I, Aiello LP, et al.; Diabetes Control and Complications Trial (DCCT)/Epidemiology of Diabetes Interventions and Complications (EDIC) Research Group. Risk factors for retinopathy in type 1 diabetes: the DCCT/EDIC Study. *Diabetes Care* 2019;42:875–882
- Ceriello A, Kumar S, Piconi L, Esposito K, Giugliano D. Simultaneous control of hyperglycemia and oxidative stress normalizes endothelial function in type 1 diabetes. *Diabetes Care* 2007;30:649–654
- Munusamy S, MacMillan-Crow LA. Mitochondrial superoxide plays a crucial role in the development of mitochondrial dysfunction during high glucose exposure in rat renal proximal tubular cells. *Free Radic Biol Med* 2009;46:1149–1157
- Weir DC, Jennings PE, Hendy MS, Barnett AH, Burge PS. Transfer factor for carbon monoxide in patients with diabetes with and without microangiopathy. *Thorax* 1988;43:725–726
- Scaramuzza AE, Morelli M, Rizzi M, et al. Impaired diffusing capacity for carbon monoxide

- in children with type 1 diabetes: is this the first sign of long-term complications? *Acta Diabetol* 2012;49:159–164
6. Lee MJ, Coast JR, Hempleman SC, Baldi JC. Type 1 diabetes duration decreases pulmonary diffusing capacity during exercise. *Respiration* 2016;91:164–170
  7. Niranjana V, McBrayer DG, Ramirez LC, Raskin P, Hsia CC. Glycemic control and cardiopulmonary function in patients with insulin-dependent diabetes mellitus. *Am J Med* 1997;103:504–513
  8. Tagougui S, Leclair E, Fontaine P, et al. Muscle oxygen supply impairment during exercise in poorly controlled type 1 diabetes. *Med Sci Sports Exerc* 2015;47:231–239
  9. Crowther GJ, Milstein JM, Jubrias SA, Kushmerick MJ, Gronka RK, Conley KE. Altered energetic properties in skeletal muscle of men with well-controlled insulin-dependent (type 1) diabetes. *Am J Physiol Endocrinol Metab* 2003;284:E655–E662
  10. Item F, Heinzer-Schweizer S, Wyss M, et al. Mitochondrial capacity is affected by glycemic status in young untrained women with type 1 diabetes but is not impaired relative to healthy untrained women. *Am J Physiol Regul Integr Comp Physiol* 2011;301:R60–R66
  11. Cree-Green M, Newcomer BR, Brown MS, et al. Delayed skeletal muscle mitochondrial ADP recovery in youth with type 1 diabetes relates to muscle insulin resistance. *Diabetes* 2015;64:383–392
  12. Wallberg-Henriksson H, Gunnarsson R, Henriksson J, Ostman J, Wahren J. Influence of physical training on formation of muscle capillaries in type I diabetes. *Diabetes* 1984;33:851–857
  13. Harmer AR, Chisholm DJ, McKenna MJ, et al. Sprint training increases muscle oxidative metabolism during high-intensity exercise in patients with type 1 diabetes. *Diabetes Care* 2008;31:2097–2102
  14. Fritzsche K, Blüher M, Schering S, et al. Metabolic profile and nitric oxide synthase expression of skeletal muscle fibers are altered in patients with type 1 diabetes. *Exp Clin Endocrinol Diabetes* 2008;116:606–613
  15. Kuznetsov AV, Veksler V, Gellerich FN, Saks V, Margreiter R, Kunz WS. Analysis of mitochondrial function in situ in permeabilized muscle fibers, tissues and cells. *Nat Protoc* 2008;3:965–976
  16. Monaco CMF, Hughes MC, Ramos SV, et al. Altered mitochondrial bioenergetics and ultrastructure in the skeletal muscle of young adults with type 1 diabetes. *Diabetologia* 2018;61:1411–1423
  17. Kriska AM, Knowler WC, LaPorte RE, et al. Development of questionnaire to examine relationship of physical activity and diabetes in Pima Indians. *Diabetes Care* 1990;13:401–411
  18. Whipp BJ, Higgenbotham MB, Cobb FC. Estimating exercise stroke volume from asymptotic oxygen pulse in humans. *J Appl Physiol* (1985) 1996;81:2674–2679
  19. Barstow TJ. Understanding near infrared spectroscopy and its application to skeletal muscle research. *J Appl Physiol* (1985) 2019;126:1360–1376
  20. Daussin FN, Zoll J, Ponsot E, et al. Training at high exercise intensity promotes qualitative adaptations of mitochondrial function in human skeletal muscle. *J Appl Physiol* (1985) 2008;104:1436–1441
  21. Komatsu WR, Barros Neto TL, Chacra AR, Dib SA. Aerobic exercise capacity and pulmonary function in athletes with and without type 1 diabetes. *Diabetes Care* 2010;33:2555–2557
  22. Ditzel J. Oxygen transport impairment in diabetes. *Diabetes* 1976;25(Suppl.):832–838
  23. Rissanen AP, Tikkanen HO, Koponen AS, Aho JM, Peltonen JE. Central and peripheral cardiovascular impairments limit VO<sub>2</sub>(peak) in type 1 diabetes. *Med Sci Sports Exerc* 2015;47:223–230
  24. Volianitis S, Secher NH. Cardiovascular control during whole body exercise. *J Appl Physiol* (1985) 2016;121:376–390
  25. Gusso S, Pinto TE, Baldi JC, Robinson E, Cutfield WS, Hofman PL. Diastolic function is reduced in adolescents with type 1 diabetes in response to exercise. *Diabetes Care* 2012;35:2089–2094
  26. Pichler G, Urlesberger B, Jirak P, et al. Reduced forearm blood flow in children and adolescents with type 1 diabetes (measured by near-infrared spectroscopy). *Diabetes Care* 2004;27:1942–1946
  27. Steinberg HO, Baron AD. Vascular function, insulin resistance and fatty acids. *Diabetologia* 2002;45:623–634
  28. Dye AS, Huang H, Bauer JA, Hoffman RP. Hyperglycemia increases muscle blood flow and alters endothelial function in adolescents with type 1 diabetes. *Exp Diabetes Res* 2012;2012:170380
  29. Fayh AP, Krause M, Rodrigues-Krause J, et al. Effects of L-arginine supplementation on blood flow, oxidative stress status and exercise responses in young adults with uncomplicated type I diabetes. *Eur J Nutr* 2013;52:975–983
  30. Lauer T, Preik M, Rassaf T, et al. Plasma nitrite rather than nitrate reflects regional endothelial nitric oxide synthase activity but lacks intrinsic vasodilator action. *Proc Natl Acad Sci U S A* 2001;98:12814–12819
  31. Story CJ, Roberts AP, Ryall RG. Borderline maintenance of erythrocyte 2,3-diphosphoglycerate concentrations in normoxic type 1 (insulin dependent) diabetic subjects. *Clin Sci (Lond)* 1986;70:127–129
  32. Sverdlow AL, Elezaby A, Behring JB, et al. High fat, high sucrose diet causes cardiac mitochondrial dysfunction due in part to oxidative post-translational modification of mitochondrial complex II. *J Mol Cell Cardiol* 2015;78:165–173
  33. Ngo DTM, Sverdlow AL, Karki S, et al. Oxidative modifications of mitochondrial complex II are associated with insulin resistance of visceral fat in obesity. *Am J Physiol Endocrinol Metab* 2019;316:E168–E177
  34. Keightley JA, Hoffbuhr KC, Burton MD, et al. A microdeletion in cytochrome c oxidase (COX) subunit III associated with COX deficiency and recurrent myoglobinuria. *Nat Genet* 1996;12:410–416
  35. Choksi KB, Boylston WH, Rabek JP, Widger WR, Papaconstantinou J. Oxidatively damaged proteins of heart mitochondrial electron transport complexes. *Biochim Biophys Acta* 2004;1688:95–101
  36. Chen J, Schenker S, Frosto TA, Henderson GI. Inhibition of cytochrome c oxidase activity by 4-hydroxynonenal (HNE). Role of HNE adduct formation with the enzyme subunits. *Biochim Biophys Acta* 1998;1380:336–344
  37. Gregory JM, Kraft G, Scott MF, et al. Insulin delivery into the peripheral circulation: a key contributor to hypoglycemia in type 1 diabetes. *Diabetes* 2015;64:3439–3451
  38. Wiedemann FR, Kunz WS. Oxygen dependence of flux control of cytochrome c oxidase – implications for mitochondrial diseases. *FEBS Lett* 1998;422:33–35
  39. Krause MP, Riddell MC, Hawke TJ. Effects of type 1 diabetes mellitus on skeletal muscle: clinical observations and physiological mechanisms. *Pediatr Diabetes* 2011;12:345–364
  40. Thapa D, Nichols CE, Lewis SE, et al. Transgenic overexpression of mitofilin attenuates diabetes mellitus-associated cardiac and mitochondrial dysfunction. *J Mol Cell Cardiol* 2015;79:212–223
  41. Baron AD, Brechtel G, Wallace P, Edelman SV. Rates and tissue sites of non-insulin- and insulin-mediated glucose uptake in humans. *Am J Physiol* 1988;255:E769–E774
